# Supplementary material for: Patterning ganglionic eminences in developing human brain organoids using a morphogen-gradient-inducing device
Source: PubMed Central journal article supplement — Cell Rep Methods. 2024 Jan 15;4(1):100689. doi: 10.1016/j.crmeth.2023.100689 (PMC10831957; doi:10.1016/j.crmeth.2023.100689), 2024-01-15
Supplement: mmc1.pdf [file mmc1.pdf]

**Cell Reports Methods, Volume 4**

**Supplemental information**

**Patterning ganglionic eminences  
in developing human brain organoids using  
a morphogen-gradient-inducing device**

**Narciso Pavon, Karmen Diep, Feiyu Yang, Rebecca Sebastian, Beatriz Martinez-  
Martin, Ravi Ranjan, Yubing Sun, and ChangHui Pak**

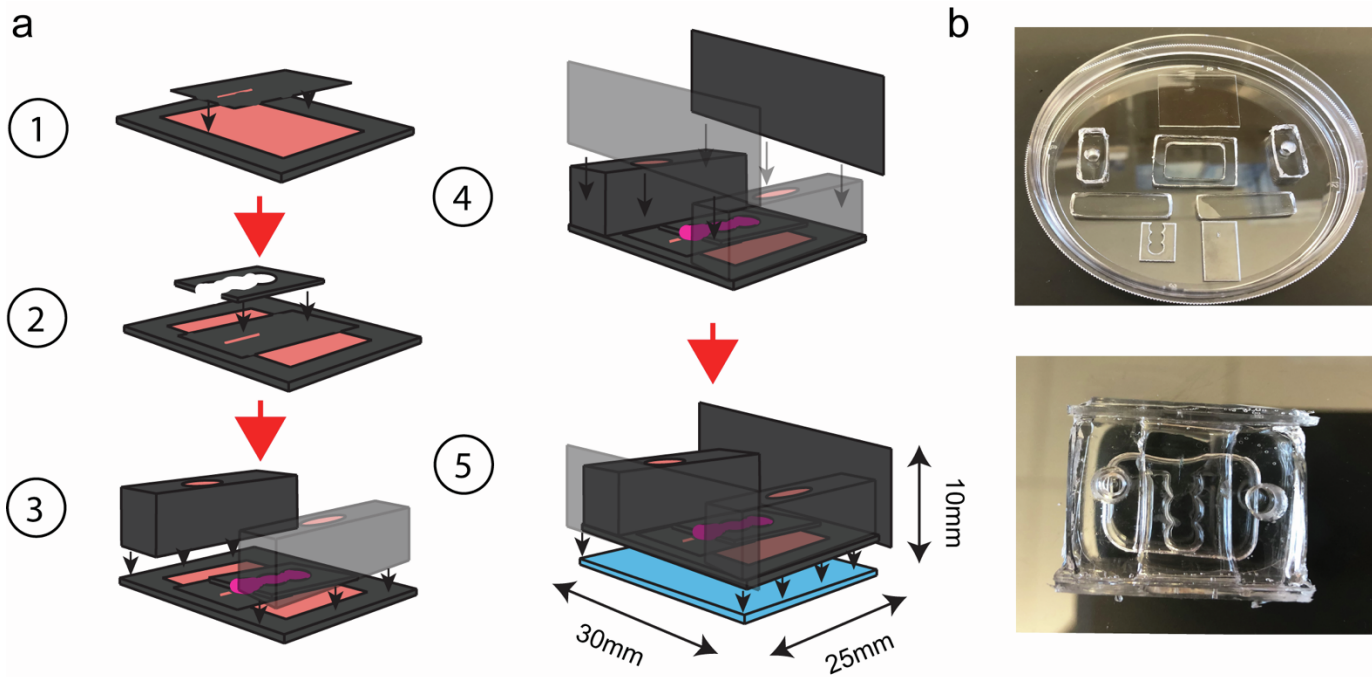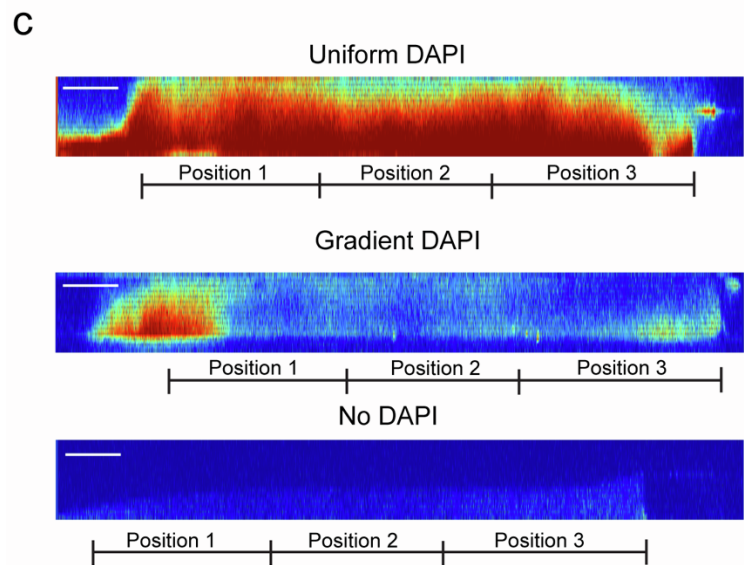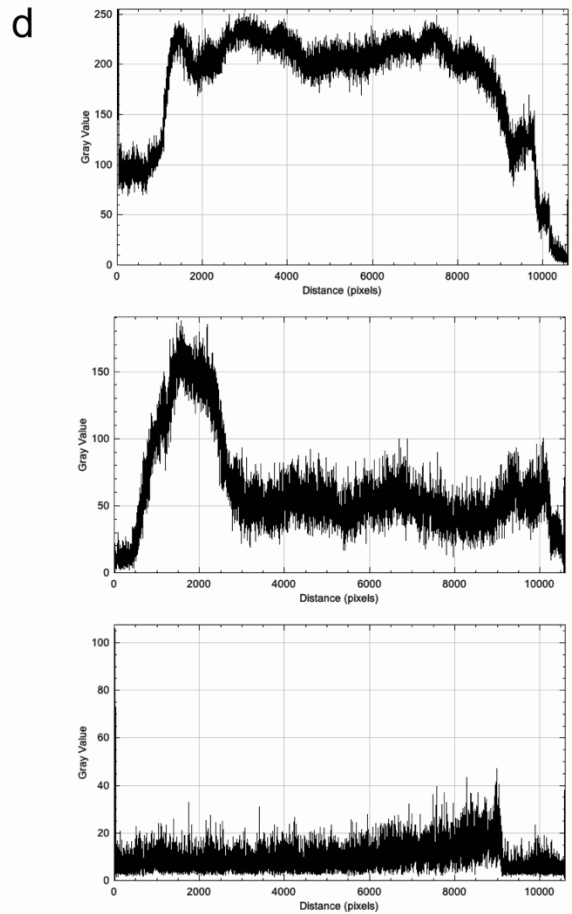

**Supplemental FIGURE 1 | PDMS device assembly and gradient quantification (Related to Figure 1).**

(A) Numbered, step by step schematic of PDMS device assembly. 1: Culturing area with laser-cut slit placed on chemical chamber base. 2: Matrigel embedding scaffolds placed over culturing area. 3: Inlet/outlet placed on both sides of device. 4: Encapsulating pieces to create a self-containing region for culture medium. 5: Entire device is secured to a glass bottom to fully seal the chemical reservoir.

(B) (Left) Unassembled, Individual PDMS slabs required to make one PDMS device. (Right) Fully assembled PDMS device.

(C) Each condition was carried out characterized after 24 hours in culture. Slice views of compounded and merged Z stack images were used to recreate Matrigel profile. Jet LUT was used to visualize DAPI intensity. (Top) Slice view of DAPI signal retained by Matrigel layer when DAPI containing media is added directly into the culturing area. (Middle) DAPI intensity profile when DAPI containing media is added only into the chemical chamber to elicit passive diffusion. (Bottom) Lack of DAPI signal in Matrigel when no DAPI containing media is added at all. Scale bar is 1000 $\mu$ m.

(D) The profile plot takes the mean intensity of all pixels in a column (y direction) and plots them across distance (x direction).

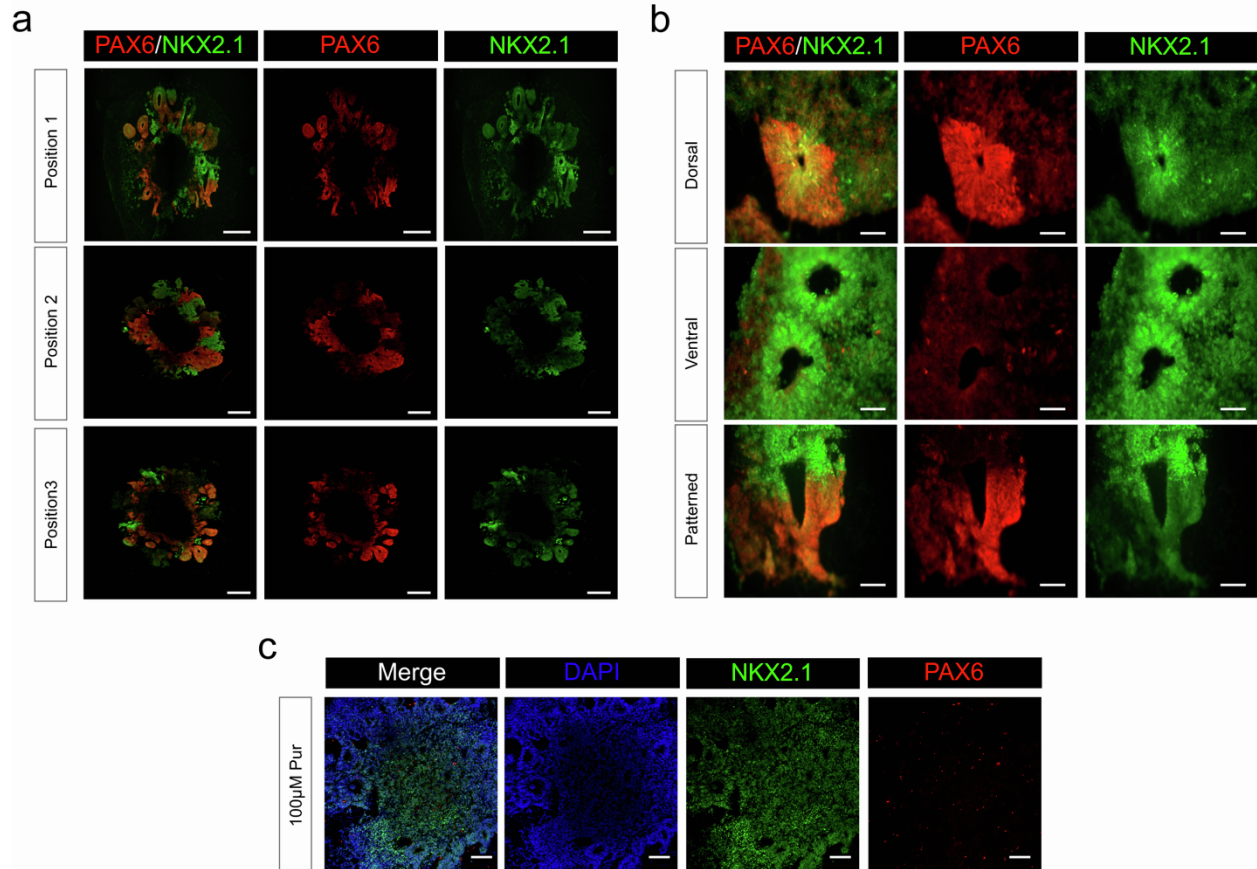

**Supplemental FIGURE 2 | Characterizing the effects of purmorphamine (Pur) gradient on forebrain organoids (Related to Figure 2).**

(A) Representative confocal images of NKX2.1 and PAX6 staining in device-patterned organoids (1 μM Pur) at different distances from Pur source. 500 μm scale bars.

(B) Representative confocal images displaying various rosette features observed in patterned organoids (1 μM Pur). 50 μm scale bars.

(C) Organoid cultured in PDMS device and exposed to 100 μM Pur gradient shows full ventralization. 200 μm scale bar.

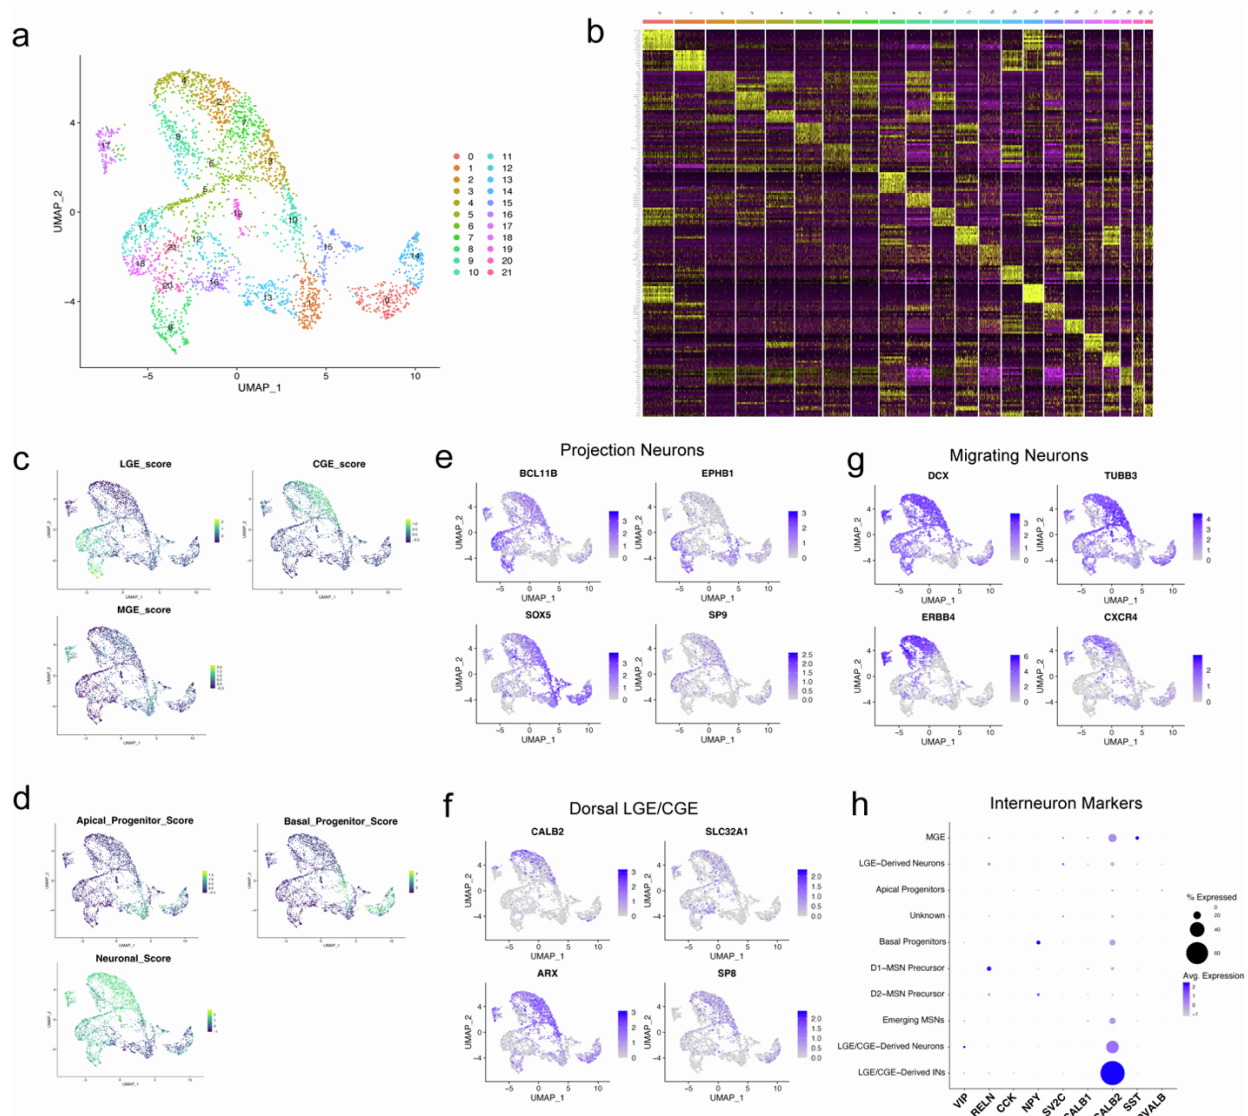

**Supplemental FIGURE 3 | Characterization of mature neuronal subtypes in 4-month device grown MIBOs (Related to Figure 3).**

(A) UMAP of 3,366 single cells dissociated from 4-month MIBO before cell annotation. A total of 22 clusters were established using the first 30 principal components and a fine resolution of 2.0.

(B) Heatmap showing top 5 genes expressed for each cluster.

(C) UMAPs showing combined expression for canonical markers for each of the GEs. LGE: ZFH3, ZNF503, MEIS2, FOXP1, EBF1, ISL1, RBFOX1. CGE: NR2F2, PROX1, SP9, SCGN, PRKCA. MGE: NKX2.1, LHX6, LHX8, SOX6.

(D) UMAPs showing combined expression for progenitors and mature cell types. Apical progenitors: NES, HES1. Basal progenitors: ASCL1, HES6. Neuronal cells: MAP2, STMN2, DCX.

(E) Feature maps for key marker of projection neurons.

(F) Feature maps identifying dorsal LGE and CGE.

(G) Feature maps showing migrating neurons with top row for general migration and bottom row more specific to IN migration.

(H) Dot plot displaying percentage and average expression of IN associated markers detected within the MIBOs.

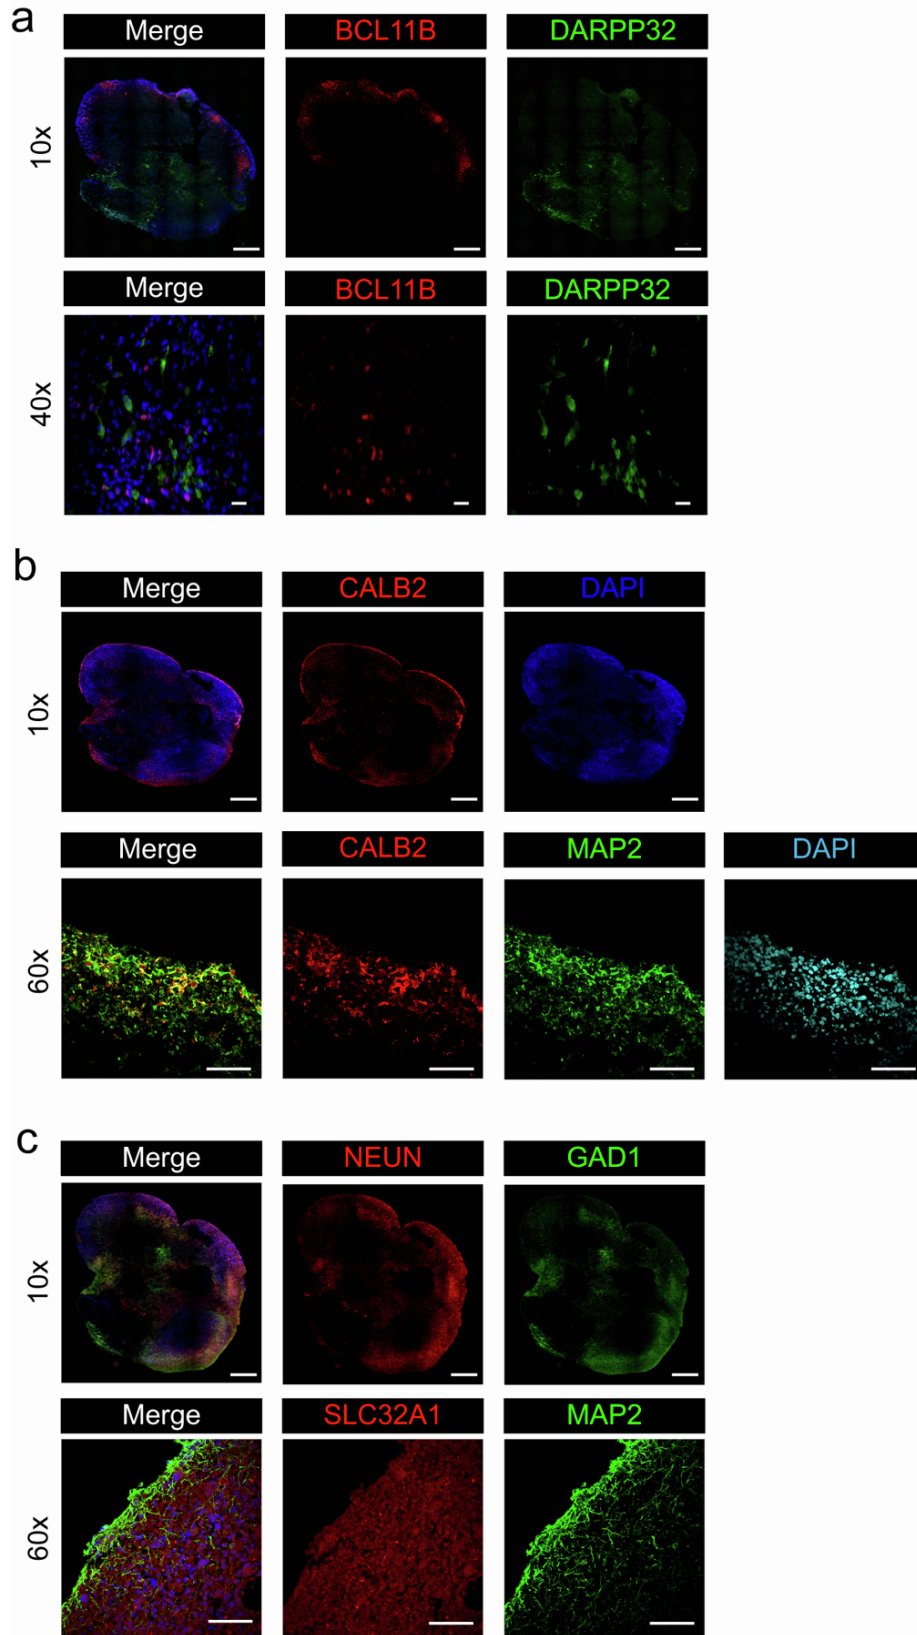



**Supplemental FIGURE 4 | Characterizing 3.5-month-old MIBOs through immunohistochemistry (Related to Figure 3)**

(A) Visualization of emerging MSNs within MIBOs using a combination BCL11B and DARPP32. Scalebar for Merged 10x image is at 500 $\mu$ m and 40x scale bar is 50 $\mu$ m.

(B) CALB2+ INs can be seen tangentially migrating through the outermost layers of the organoid. Instances of more mature CALB2+ INs can be identified by the co-expression of MAP2. Images captured as 60x contain 50 $\mu$ m scale bars.

(C) Identification of mature GABAergic cells using NEUN (FOXP3), Pan-neuronal marker, GAD1 and SLC32A1 for identifying GABA production, and MAP2, dendritic marker.



**a**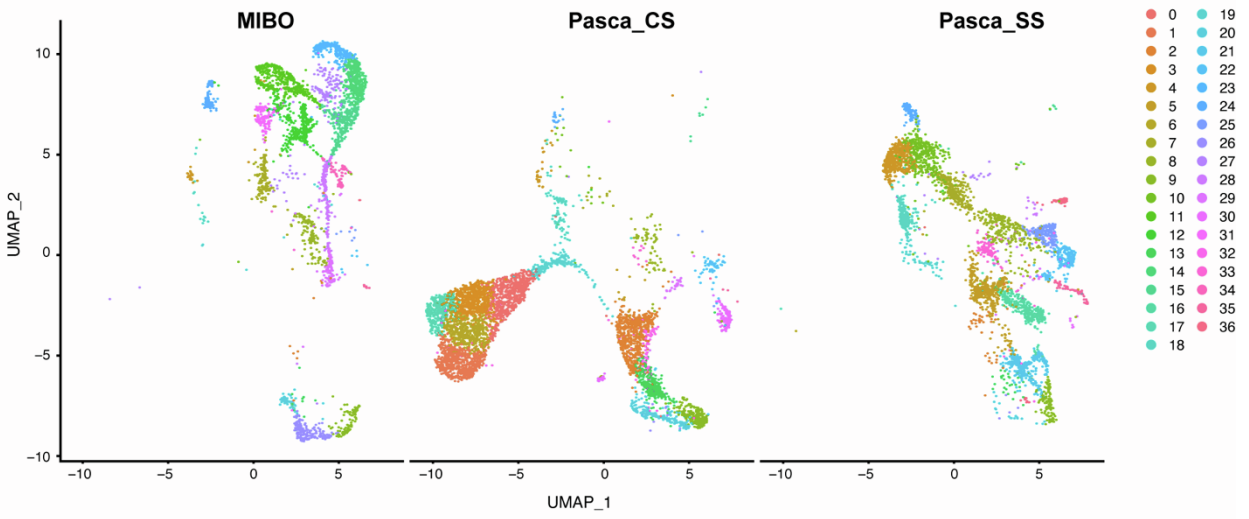**b**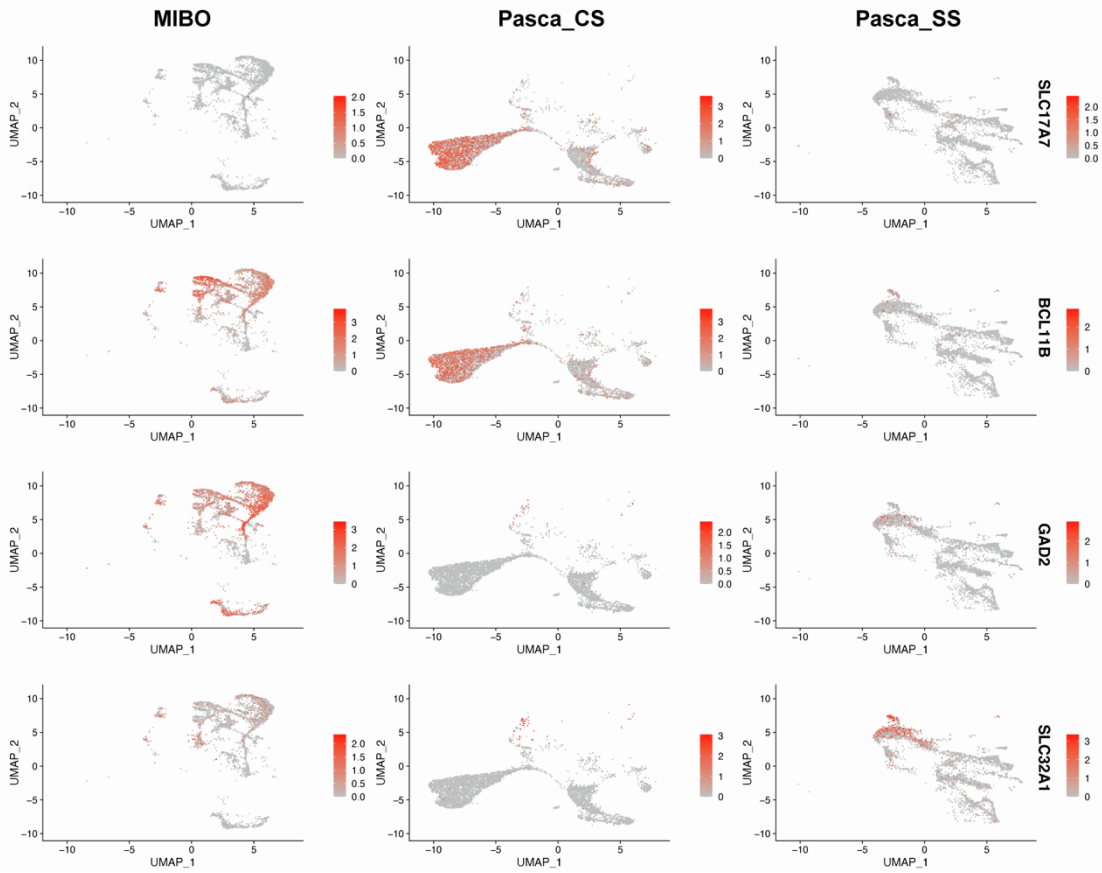

**Supplemental FIGURE 5 | Feature plots used to visualize unique genetic signatures within BCL11B clusters (Related to Figure 5).**

- (A) Integrated UMAP split to show the individual contribution of each protocol to the total dataset.
- (B) Key features used to extrapolate the difference between BCL11B population in MIBO vs Pasca CS.

Cortical Trajectory

IN Characterization

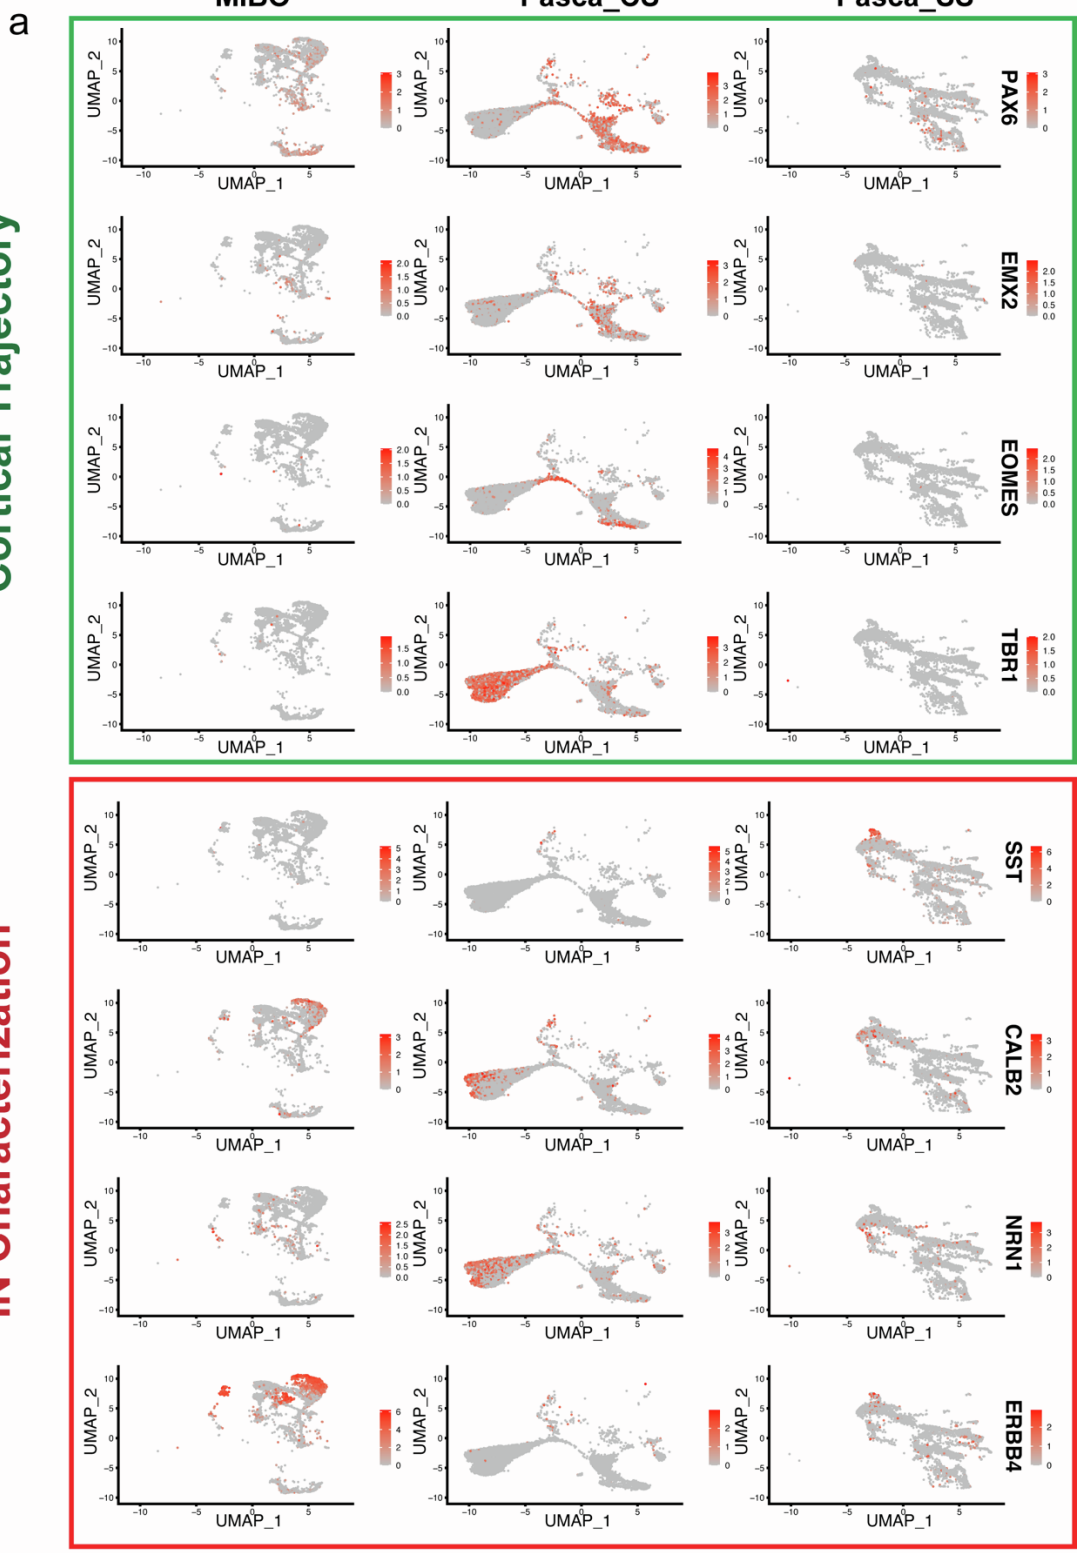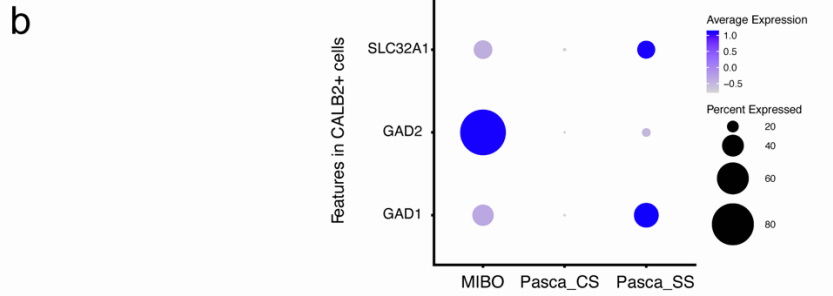

**Supplemental FIGURE 6 | Identifying the developmental trajectory of cortical neurons  
(Related to Figure 5).**

- (A) Feature plots used to visualize the unique developmental trajectory from cortical progenitors to mature glutamatergic cortical neurons (Green Box). Feature plots split by sample to characterize IN populations present in each sample.
- (B) Dot plot visualizing expression of GABAergic markers within the CALB2+ populations of each sample.
